# Supplementary material for: Physiological and Biochemical Mechanisms of Wood Vinegar-Induced Stress Response against Tomato Fusarium Wilt Disease
Source: MDPI journal article supplement (doi:10.3390/plants13020157), 2024-01-06
Supplement: s1 [file s1]

**Table S1:** Relative content of main compounds in ZM wood vinegar

| Group                        | Compound name                 | Chemical formula                               | R.T. /min | Area (%) |
|------------------------------|-------------------------------|------------------------------------------------|-----------|----------|
| <b>Acids</b>                 | N-Ethylglycine                | C <sub>4</sub> H <sub>9</sub> NO <sub>2</sub>  | 12.42     | 18.46    |
|                              | lactic acid                   | C <sub>3</sub> H <sub>6</sub> O <sub>3</sub>   | 7.42      | 14.3     |
|                              | 3-Hydroxypyridine             | C <sub>5</sub> H <sub>5</sub> NO               | 8.61      | 10.25    |
|                              | palmitic acid                 | C <sub>16</sub> H <sub>32</sub> O <sub>2</sub> | 19.32     | 4.9      |
|                              | 2-ketoadipate                 | C <sub>6</sub> H <sub>8</sub> O <sub>5</sub>   | 10.05     | 3.46     |
|                              | glycolic acid                 | C <sub>2</sub> H <sub>4</sub> O <sub>3</sub>   | 7.68      | 2.12     |
|                              | stearic acid                  | C <sub>18</sub> H <sub>36</sub> O <sub>2</sub> | 21.11     | 1.64     |
|                              | adipic acid                   | C <sub>6</sub> H <sub>10</sub> O <sub>4</sub>  | 13.38     | 1.37     |
|                              | Minors                        | —                                              | —         | 0.9      |
| <b>Phenols</b>               | catechol                      | C <sub>6</sub> H <sub>6</sub> O <sub>2</sub>   | 11.06     | 13.14    |
|                              | guaiacol                      | C <sub>7</sub> H <sub>8</sub> O <sub>2</sub>   | 9.84      | 11.04    |
|                              | m-cresol                      | C <sub>7</sub> H <sub>8</sub> O                | 8.63      | 1.64     |
|                              | o-cresol                      | C <sub>7</sub> H <sub>8</sub> O                | 8.50      | 0.34     |
|                              | Minors                        | —                                              | —         | 0.29     |
| <b>Ketones</b>               | 1,3-Cyclohexanedione          | C <sub>6</sub> H <sub>8</sub> O <sub>2</sub>   | 10.74     | 1.03     |
|                              | 1,2-Cyclohexanedione          | C <sub>6</sub> H <sub>8</sub> O <sub>2</sub>   | 15.33     | 1.03     |
|                              | Minors                        | —                                              | —         | 0.41     |
| <b>Esters</b>                | Methyl jasmonate              | C <sub>13</sub> H <sub>20</sub> O <sub>3</sub> | 16.17     | 1.19     |
|                              | D-erythronolactone            | C <sub>4</sub> H <sub>6</sub> O <sub>4</sub>   | 12.47     | 0.1      |
|                              | Minors                        | —                                              | —         | 0.04     |
| <b>Aldehydes</b>             | succinate semialdehyde        | C <sub>4</sub> H <sub>6</sub> O <sub>3</sub>   | 9.20      | 3.25     |
|                              | glutaraldehyde 3              | C <sub>5</sub> H <sub>8</sub> O <sub>2</sub>   | 10.54     | 0.2      |
|                              | 2,5-dihydroxybenzaldehyde     | C <sub>7</sub> H <sub>6</sub> O <sub>3</sub>   | 15.94     | 0.17     |
|                              | butyraldehyde                 | C <sub>4</sub> H <sub>8</sub> O                | 10.50     | 0.15     |
|                              | Minors                        | —                                              | —         | 0.03     |
| <b>Alcohols</b>              | Perillyl Alcohol              | C <sub>10</sub> H <sub>16</sub> O              | 12.21     | 1.96     |
|                              | 3-Methylamino-1,2-propanediol | C <sub>4</sub> H <sub>11</sub> NO <sub>2</sub> | 9.46      | 0.44     |
|                              | (+)-Dihydrocarveol            | C <sub>10</sub> H <sub>18</sub> O              | 10.72     | 0.29     |
|                              | 3-Methylbenzyl Alcohol        | C <sub>8</sub> H <sub>10</sub> O               | 10.00     | 0.13     |
|                              | Acetol                        | C <sub>3</sub> H <sub>6</sub> O <sub>2</sub>   | 13.71     | 0.12     |
|                              | Minors                        | —                                              | —         | 0.26     |
| <b>Undetected substances</b> | —                             | —                                              | —         | 5.66     |

**Table S2:** Relative content of main compounds in SM wood vinegar

| Group                        | Compound name                 | Chemical formula                               | R.T. /min | Area(%) |
|------------------------------|-------------------------------|------------------------------------------------|-----------|---------|
| <b>Acids</b>                 | palmitic acid                 | C <sub>16</sub> H <sub>32</sub> O <sub>2</sub> | 19.32     | 12.93   |
|                              | lactic acid                   | C <sub>3</sub> H <sub>6</sub> O <sub>3</sub>   | 7.42      | 8.73    |
|                              | picolinic acid                | C <sub>6</sub> H <sub>5</sub> NO <sub>2</sub>  | 11.09     | 5.68    |
|                              | 2-ketoadipate                 | C <sub>6</sub> H <sub>8</sub> O <sub>5</sub>   | 10.05     | 4.56    |
|                              | N-Ethylglycine                | C <sub>4</sub> H <sub>9</sub> NO <sub>2</sub>  | 12.42     | 4.49    |
|                              | adipic acid                   | C <sub>6</sub> H <sub>10</sub> O <sub>4</sub>  | 13.38     | 2.99    |
|                              | stearic acid                  | C <sub>18</sub> H <sub>36</sub> O <sub>2</sub> | 21.11     | 2.98    |
|                              | glycolic acid                 | C <sub>2</sub> H <sub>4</sub> O <sub>3</sub>   | 7.68      | 1.77    |
|                              | 2-hydroxybutanoic acid        | C <sub>4</sub> H <sub>8</sub> O <sub>3</sub>   | 8.33      | 0.64    |
| <b>Phenols</b>               | Minors                        | —                                              | —         | 1.6     |
|                              | guaiacol                      | C <sub>7</sub> H <sub>8</sub> O <sub>2</sub>   | 9.84      | 11.39   |
|                              | catechol                      | C <sub>6</sub> H <sub>6</sub> O <sub>2</sub>   | 11.06     | 9.32    |
|                              | m-cresol                      | C <sub>7</sub> H <sub>8</sub> O                | 8.63      | 2.82    |
|                              | o-cresol                      | C <sub>7</sub> H <sub>8</sub> O                | 8.50      | 1.29    |
|                              | Minors                        | —                                              | —         | 0.14    |
| <b>Ketones</b>               | 1,3-Cyclohexanedione          | C <sub>6</sub> H <sub>8</sub> O <sub>2</sub>   | 10.74     | 3.56    |
|                              | 1,2-Cyclohexanedione          | C <sub>6</sub> H <sub>8</sub> O <sub>2</sub>   | 15.33     | 2.38    |
|                              | Minors                        | —                                              | —         | 0.13    |
| <b>Esters</b>                | D-erythroneolactone           | C <sub>4</sub> H <sub>6</sub> O <sub>4</sub>   | 12.47     | 3.14    |
|                              | Linoleic acid methyl ester    | C <sub>19</sub> H <sub>34</sub> O <sub>2</sub> | 19.77     | 1.01    |
|                              | Minors                        | —                                              | —         | 0.09    |
| <b>Aldehydes</b>             | glutaraldehyde                | C <sub>5</sub> H <sub>8</sub> O <sub>2</sub>   | 10.54     | 1.23    |
|                              | 2,5-dihydroxybenzaldehyde     | C <sub>7</sub> H <sub>6</sub> O <sub>3</sub>   | 15.94     | 1.11    |
|                              | succinate semialdehyde        | C <sub>4</sub> H <sub>6</sub> O <sub>3</sub>   | 9.20      | 1.1     |
|                              | Minors                        | —                                              | —         | 0.06    |
| <b>Alcohols</b>              | Perillyl Alcohol              | C <sub>10</sub> H <sub>16</sub> O              | 12.21     | 3.54    |
|                              | 3-Methylbenzyl Alcohol        | C <sub>8</sub> H <sub>10</sub> O               | 10.00     | 0.58    |
|                              | (+)-Dihydrocarveol            | C <sub>10</sub> H <sub>18</sub> O              | 10.72     | 0.44    |
|                              | 3-Methylamino-1,2-propanediol | C <sub>4</sub> H <sub>11</sub> NO <sub>2</sub> | 9.46      | 0.29    |
|                              | Acetol                        | C <sub>3</sub> H <sub>6</sub> O <sub>2</sub>   | 13.71     | 0.29    |
|                              | Minors                        | —                                              | —         | 0.16    |
| <b>Undetected substances</b> | —                             | —                                              | —         | 10.78   |
